# Supplementary material for: In low transpiring conditions, uncoupling the BnNrt2.1 and BnNrt1.1 NO3- transporters by glutamate treatment reveals the essential role of BnNRT2.1 for nitrate uptake and the nitrate-signaling cascade during growth
Source: PubMed Central journal article supplement — Plant Signal Behav. 2013 Jan 8;8(2):e22904. doi: 10.4161/psb.22904 (PMC3656991; doi:10.4161/psb.22904), 2013-01-08
Supplement: psb-8-e22904-s01.pdf [file psb-8-e22904-s01.pdf]

## **Supplemental Material to:**

**Antonin Leblanc, Raphaël Segura, Carole Deleu and Erwan  
Le Deunff**

**In low transpiring conditions, uncoupling the *BnNrt2.1*  
and *BnNrt1.1* NO<sub>3</sub><sup>-</sup> transporters by glutamate treatment  
reveals the essential role of BnNRT2.1 for nitrate uptake  
and the nitrate-signaling cascade during growth**

**Plant Signaling & Behavior 2012; 8(2)**

**<http://dx.doi.org/10.4161/psb.22902>**

**<http://www.landesbioscience.com/journals/psb/article/22902>**

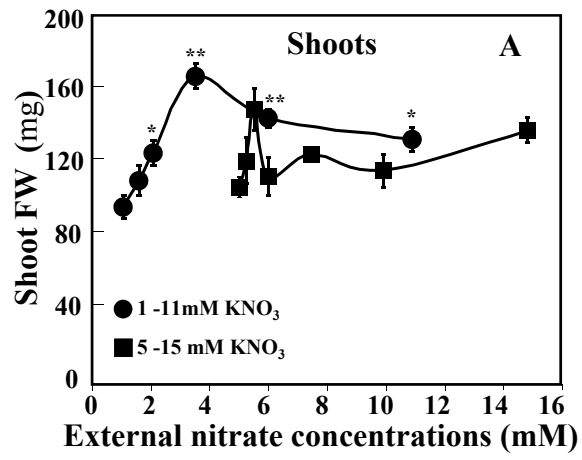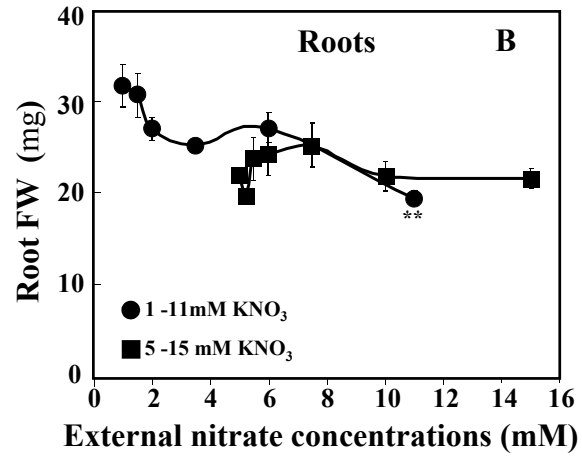

**Figure S1:** Leblanc *et al.*. (2012)  
PSB pub2

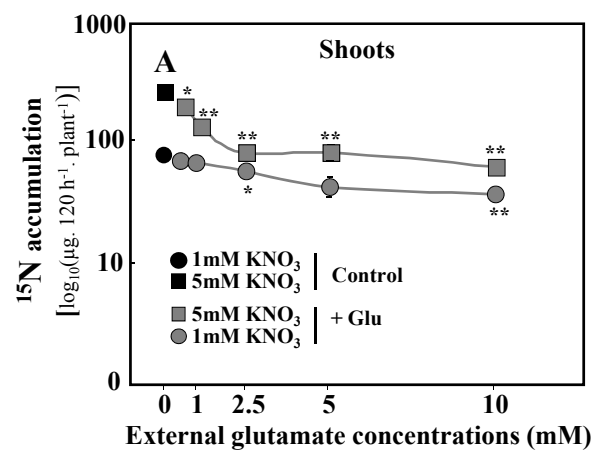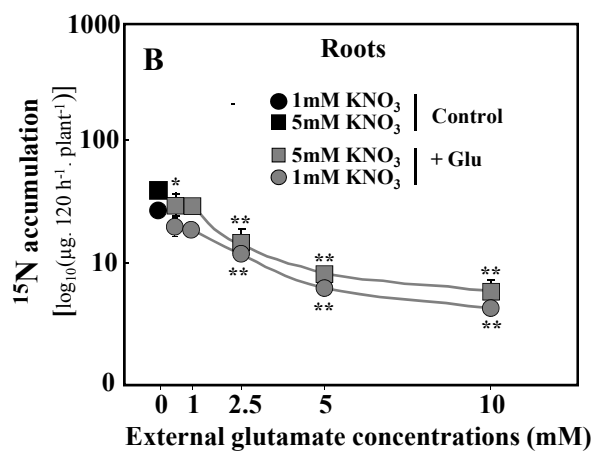

**Figure S2:** Leblanc *et al.*. (2012)  
PSB pub2

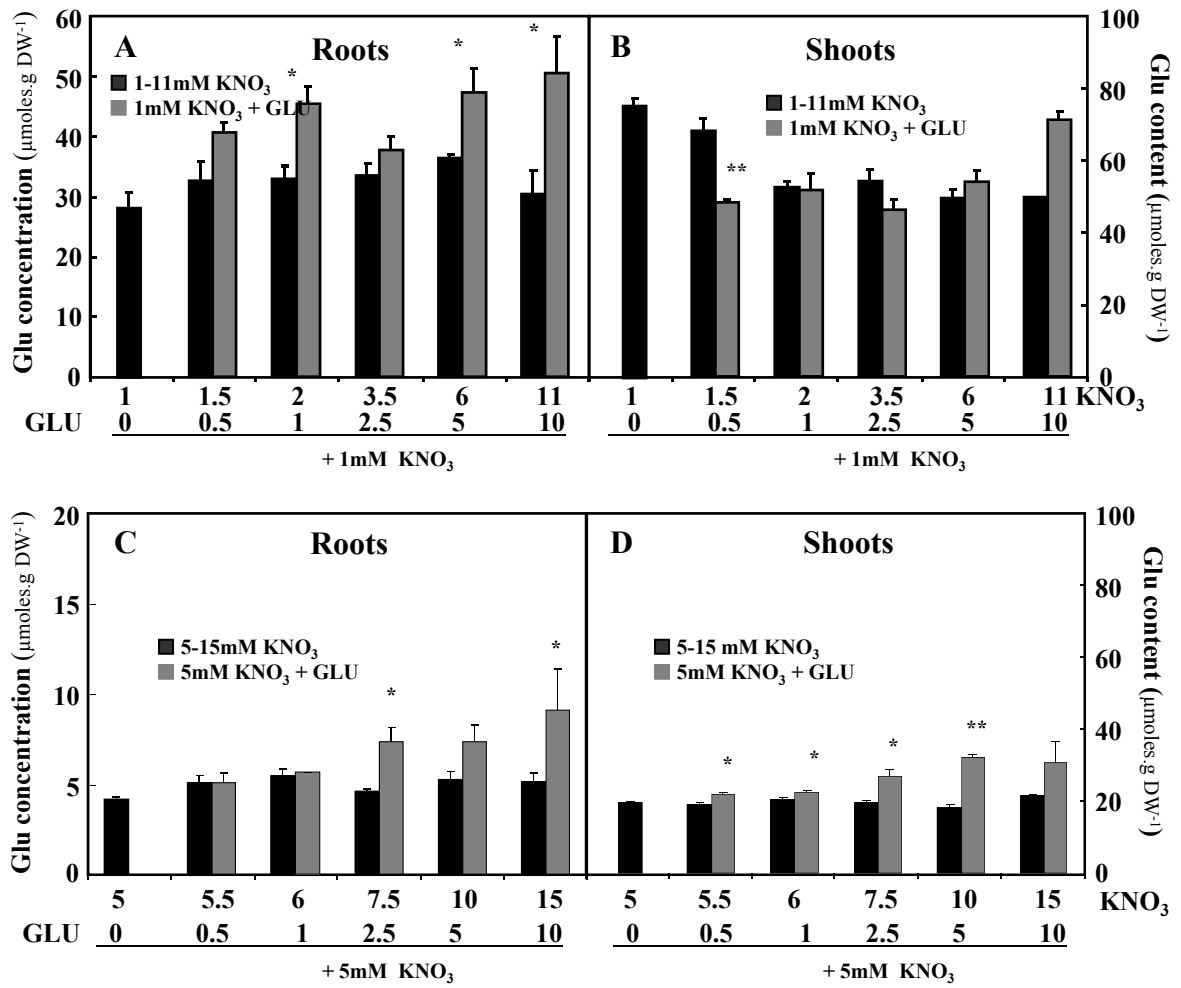

**Figure S3:** Leblanc *et al.*. (2012)  
PSB pub2

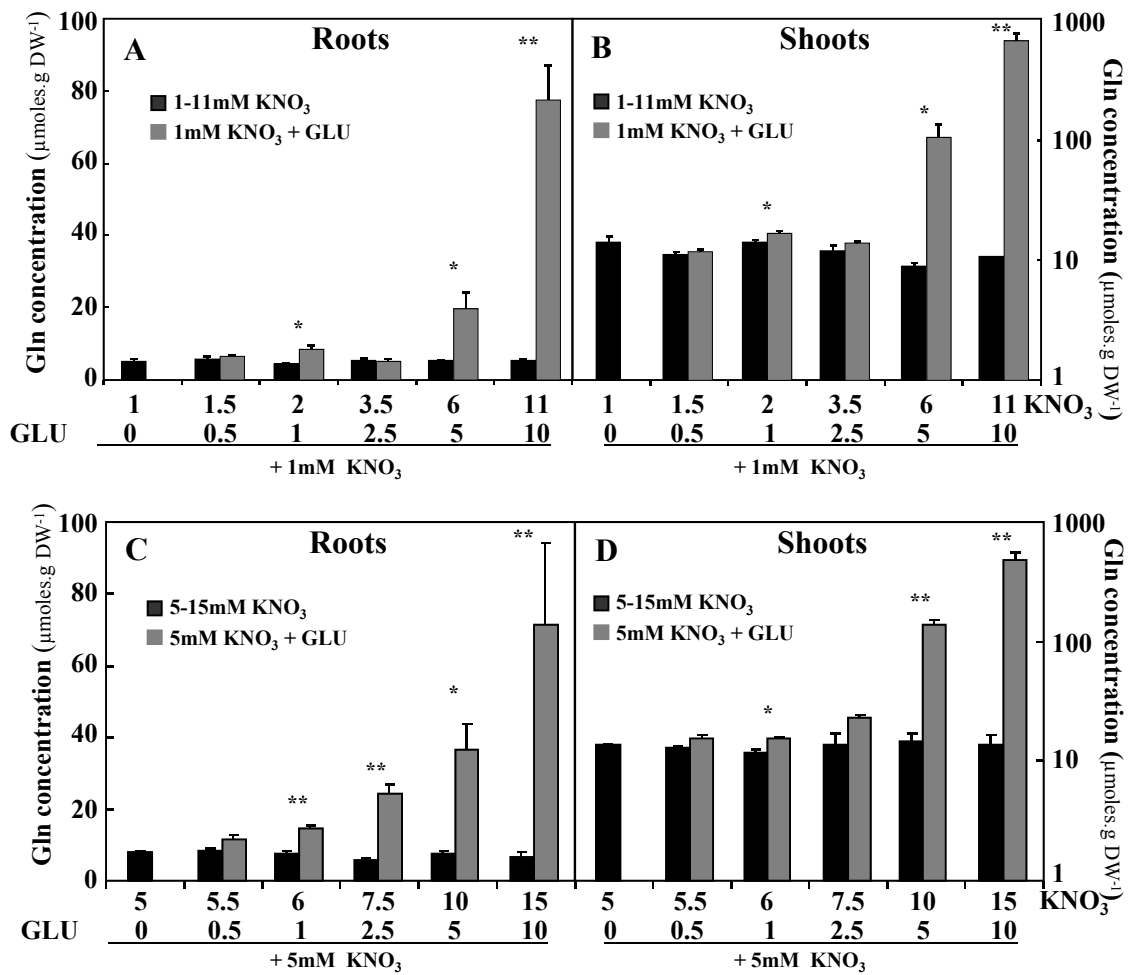

**Figure S4:** Leblanc *et al.*. (2012)  
PSB pub2

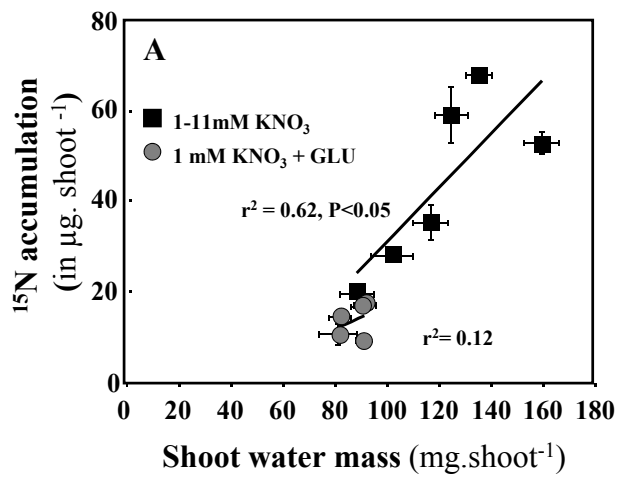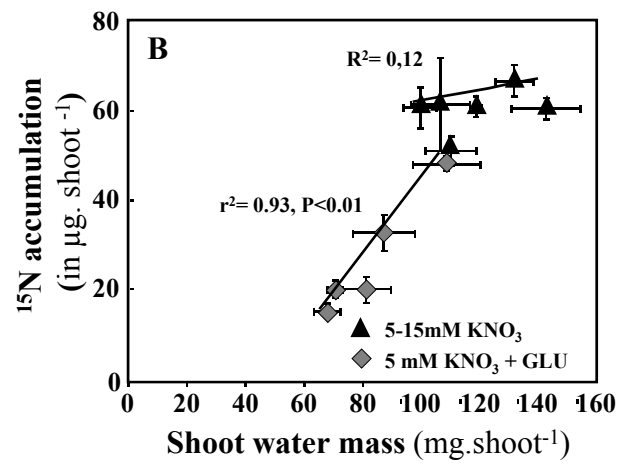

**Figure S5:** Leblanc *et al.*. (2012)  
PSB pub2
